# Supplementary material for: A multi-phase structured cascade model for mass training of community healthcare workers in performing clinical breast exams in remote regions
Source: PubMed Central journal article supplement (PMC11659790; doi:10.7189/jogh.14.04255), 2024-12-20
Supplement: jogh-14-04255-s001.pdf [file jogh-14-04255-s001.pdf]

## Online Supplementary Document

### Appendix S1

نالج اسسمنٹ ( 2 ) ( 1 ) Knowledge Assessment:

Date: تاریخ \_\_\_\_\_

Site: سائٹ \_\_\_\_\_

Name: نام \_\_\_\_\_

ٹیسٹ کی قسم: (circle on e) Test Type

پری ٹیسٹ Pre-test

پوسٹ ٹیسٹ Post-test

| Mark Yes, No or Don't Know for the following:<br>مندرجہ ذیل کے لیے ہاں، نہیں یا معلوم نہیں پر نشان لگائیں۔                 |                                                                                                                                |
|----------------------------------------------------------------------------------------------------------------------------|--------------------------------------------------------------------------------------------------------------------------------|
| 1. Breast cancer is curable if detected early.<br>a. Yes<br>b. No<br>c. Don't know                                         | بریسٹ کینسر قابل علاج مرض ہے اگر جلدی پکڑا جائے۔<br>.a ہاں<br>.b نہیں<br>.c معلوم نہیں                                         |
| 2. Only individuals older than 50 years can get breast cancer.<br>a. Yes<br>b. No<br>c. Don't know                         | بریسٹ کینسر صرف پچاس سال سے زیادہ عمر کے لوگوں کو ہوتا ہے۔<br>.a ہاں<br>.b نہیں<br>.c معلوم نہیں                               |
| 3. Breast cancer only occurs in women.<br>a. Yes<br>b. No<br>c. Don't know                                                 | بریسٹ کینسر صرف عورتوں میں ہونے والی ہے<br>.a ہاں<br>.b نہیں<br>.c معلوم نہیں                                                  |
| 4. A woman who has given birth to a child and has breast-fed cannot get breast cancer.<br>a. Yes<br>b. No<br>c. Don't know | ایسی عورت جس نے بچہ پیدا کیا ہو اور بچے کو دودھ پلایا ہو اس کو بریسٹ کینسر نہیں ہو سکتا۔<br>.a ہاں<br>.b نہیں<br>.c معلوم نہیں |
| 5. Needle biopsy of a cancerous breast lump can lead to spread of cancer.<br>a. Yes<br>b. No<br>c. Don't know              | چھاتی میں کینسر والے کٹھلی کی سوئی سے بائیوپسی کرنے سے پھیل سکتا ہے<br>.a ہاں<br>.b نہیں<br>.c معلوم نہیں                      |

Choose the best answer (circle only one)

6. How often should a woman have a clinical breast exam?

عورت کو کتنے وقفہ سے چھاتی کا معائنہ کروانہ چاہیے

- a. Weekly
- b. Monthly
- c. Twice a year.
- d. Yearly
- e. Don't know

- a. ہر ہفتہ
- b. مہینے میں ایک دفعہ
- c. سال میں دو مرتبہ
- d. سالانہ
- e. معلوم نہیں

7. What is the most common cause of breast cancer in women?

عورتوں میں بریسٹ کینسر یا چھاتی کے سرطان کی وجہ عام طور پر کیا ہوتی ہے۔

- a. A family history/ genetic
- b. Sporadic/ no clearly identifiable cause.

- a. خاندان میں بیماری ہونا
- b. وجہ نہ ہونا

8. Breast cancer is treated by

بریسٹ کینسر کا علاج اس ذریعہ سے کیا جاتا ہے

- a. Surgery only
- b. Chemotherapy alone
- c. Endocrine therapy alone
- d. Radiation alone
- e. A combination of above

- a. صرف سرجری
- b. کیموتھراپی
- c. اینڈو کرائین تھراپی
- d. ریڈیشن
- e. اوپر کا مجموعہ

9. In a woman diagnosed with breast cancer, the surgical procedure includes:

عورت میں بریسٹ کینسر کی تشخیص کے بعد علاج میں آپریشن بھی شامل

- a. Surgery on breast only.
- b. Surgery on axillary lymph nodes.
- c. Surgery on both breast, and axillary lymph nodes

- a. آپریشن صرف چھاتی پر
- b. پریشن صرف بغل کے غدودا
- c. پریشن چھاتی اور بغل کے غدودا

10. What is the next diagnostic step after a woman is confirmed to have a palpable mass in the breast?

عورت کی چھاتی میں گٹھلی کی تصدیق ہونے کے بعد تشخیص کیا پیئے سب سے پہلے کونسا ٹیسٹ کروانا ہوگا

- a. Breast imaging such as mammogram/ultrasound
- b. Breast Surgery
- c. Needle biopsy of breast

- a. چھاتی کی امیجنگ جیسے میموگرام، مائٹراساؤنڈ
- b. چھاتی کی سرجری
- c. چھاتی کی سوئی سے بائیوپسی

Select all that apply for the following (can choose multiple):

یہ سب کو منتخب کریں جو درج ذیل کے لیے لاگو ہوتے ہیں (متعدد کا انتخاب کر سکتے ہیں)

11. Chance of getting breast cancer increases with:

کینسر ہونے کا امکان بڑھتا ہے جب

- a. As a woman gets older
- b. With family of history breast cancer
- c. Not having given birth to a child
- d. Obesity or increased weight
- e. Using a brassier

- a. عورت کی بڑھتی عمر
- b. خاندان میں بریسٹ کینسر ہو
- c. بچے کو پیدا نہ کرنا
- d. موٹاپا یا بڑھتا ہوا وزن
- e. بڑ پیرکا استعمال

12. Signs of breast cancer

- a. Change in the position of the nipple
- b. Pulling in the nipple
- c. Puckering or dimpling of breast skin
- d. A lump in the armpit
- e. Redness of the breast
- f. A lump in the breast
- g. Changes in the shape of the breast

- بریسٹ کینسر کے علامات
- a. نپل کا رخ تبدیل ہونا
  - b. نپل کا اندر کھینچنا
  - c. جلد میں گڑھے بڑھ جانا
  - d. بغل میں گتھلی
  - e. چھاتی کے جلد میں سرخی
  - f. چھاتی میں گتھلی
  - g. چھاتی کے شکل میں تبدیلی

13. What does it mean to have a family history of breast cancer?

- a. Having a mother who had breast cancer.
- b. Having a sister who had breast cancer
- c. Having a mother's or father's sister who had breast cancer
- d. Having a cousin who had breast cancer
- e. Having a father who had breast cancer
- f. Having a grandmother who had breast cancer

بریسٹ کینسر کی فیملی ہسٹری ہونے سے کیا مراد ہے

- a. ماں میں بریسٹ کینسر
- b. بہن میں بریسٹ کینسر
- c. خالہ یا پھوپھی میں بریسٹ کینسر
- d. کزن جس کو بریسٹ ہو
- e. باپ کو بریسٹ کینسر
- f. نانی یا دادی میں بریسٹ کینسر

Mark on a scale of 1 – 5  
ایک سے پانچ تک کے پیمانے پر نشان لگائیں

14. How confident are you in your ability to detect a breast lump >2cm in size?

پ اپنی معانہ کرنے کی صلاحیت کو جانتے ہوئے چھاتی میں ۲cm سے بڑی گتھلی پکڑنے کے بارے میں کتنی پراعتماد ہیں

| 1                    | 2                  | 3                  | 4                | 5                    |
|----------------------|--------------------|--------------------|------------------|----------------------|
| Not confident at all | Slightly confident | Somewhat confident | Fairly confident | Completely confident |
| بالکل نہیں           | بہت تھوڑی          | تھوڑی بہت          | چھی خاصی         | بہت زیادہ            |

References:

1. Keating NL, Kouri EM, Arreola Ornelas E, Magaña Valladares L, Marie Knaul F, on Mexicana para la Salud F, et al. Evaluation of Breast Cancer Knowledge Among Health Promoters in Mexico Before and After Focused Training. Global Health and Cancer The Oncologist [Internet]. 2014 [cited 2021 Dec 15];19:1091–9. Available from: <http://dx.doi.org/10.1634/theoncologist.2014-0104>
2. Dusengimana JMV, Keating NL, Hategekimana V, Rugema V, Bigirimana JB, Costas-Chavarri A, et al. Impact of Breast Cancer Early Detection Training on Rwandan Health Workers' Knowledge and Skills. Journal of Global Oncology [Internet]. 2018 Mar 1 [cited 2021 Dec 2];4(4). Available from: [/pmc/articles/PMC6223427/](http://pmc/articles/PMC6223427/)

## Appendix S2

### Modified Direct Observation of Procedural Skill (DOPS) for Evaluation of Clinical Breast Examination Technique

Date: \_\_\_\_\_

Name: \_\_\_\_\_

Choose the appropriate answer for the following:

I. The person being evaluated is a:

a. CHW      b. LHV                      c. LHW                      d. Nurse                      e. GP/gyn                      f. LMO

g. Other: \_\_\_\_\_

II. Test Type:

Pre-test                      Post-test

III. Setting where evaluated:

Clinical                      Simulated                      Other: \_\_\_\_\_

IV. The patient on whom the evaluation is conducted is:

a. N/A (simulator)                      b. Initial                      c. Follow-up

V. Patient's Diagnosis (if any established at the time of assessment):

a. None /normal                      b. Breast lump/other abnormality underwork-up  
 c. Breast cancer confirmed on biopsy awaiting surgery      d. Breast cancer survivor (previously treated)  
 e. N/A

**For each of the following, choose one (satisfactory/Unsatisfactory or Not Applicable):**

| Clinical Breast Examination Assessment |                                                                                                    |              |                |                |
|----------------------------------------|----------------------------------------------------------------------------------------------------|--------------|----------------|----------------|
|                                        |                                                                                                    | Satisfactory | Unsatisfactory | Not Applicable |
| 1                                      | Examined Sitting                                                                                   | 1            | 0              |                |
| 2                                      | Examined Supine                                                                                    | 1            | 0              |                |
| 3                                      | Examination of lymph nodes:                                                                        |              |                |                |
|                                        | Cervical lymph nodes examined                                                                      | 1            | 0              |                |
|                                        | Supraclavicular lymph nodes examined                                                               | 1            | 0              |                |
|                                        | Axillary lymph nodes examined bilaterally (2 points if both sides)                                 | 2            | 0              |                |
|                                        | Was able to identify lymphadenopathy if present                                                    | 1            | 0              | N/A            |
| <b>Inspection</b>                      |                                                                                                    |              |                |                |
| 4                                      | Appropriately commented on breast symmetry                                                         | 1            | 0              |                |
| 5                                      | Appropriately identified overlying skin changes if present (mark all that apply):                  |              |                |                |
|                                        | a. Cellulitis                                                                                      | 1            | 0              | N/A            |
|                                        | b. Edema                                                                                           | 1            | 0              | N/A            |
|                                        | c. Peau d'orange (orange peel texture of skin)                                                     | 1            | 0              | N/A            |
|                                        | d. Other visible skin changes, such as:                                                            |              |                |                |
|                                        | • Skin dimpling                                                                                    | 1            | 0              | N/A            |
|                                        | • Deformity/ abnormal shape                                                                        |              |                |                |
|                                        | • Visible nodules                                                                                  |              |                |                |
| 6                                      | Appropriately commented on nipple-areola complex (normal symmetry, retraction/ deviation, erosion) | 1            | 0              |                |
| <b>Palpation</b>                       |                                                                                                    |              |                |                |

|    |                                                                                                                                                                                                                                                                                                                                                               |   |   |     |
|----|---------------------------------------------------------------------------------------------------------------------------------------------------------------------------------------------------------------------------------------------------------------------------------------------------------------------------------------------------------------|---|---|-----|
| 7  | Appropriate technique used:<br><br><i>Palpation done using the finger pads of the index/ middle/ fourth finger, in small concentric circles using either:</i><br><ul style="list-style-type: none"> <li>○ Vertical stripe pattern</li> <li>○ Circular pattern</li> </ul>                                                                                      | 1 | 0 |     |
| 8  | All areas of the breast were palpated?                                                                                                                                                                                                                                                                                                                        | 1 | 0 |     |
| 9  | Able to identify palpable lump if present<br><br><i>Difficulty of Case (to be decided by the assessor according to the level of examinee):</i><br><br><ul style="list-style-type: none"> <li>• <input type="checkbox"/> a. Must pick-up (lump&gt;2cm, visible changes)</li> <li>• <input type="checkbox"/> b. Good to pick-up (small lump &lt;2cm)</li> </ul> | 1 | 0 | N/A |
| 10 | <b>Inference</b>                                                                                                                                                                                                                                                                                                                                              |   |   |     |
|    | Overall assessment of the breast by the examinee :<br><br><ul style="list-style-type: none"> <li>• <input type="checkbox"/> a. Normal (no visible changes or palpable abnormality)</li> <li>• <input type="checkbox"/> b. Abnormal (asymmetrical finding on either visual inspection or palpation warranting further work-up /referral)</li> </ul>            |   |   |     |
|    | Inference consistent with the assessor's                                                                                                                                                                                                                                                                                                                      | 1 | 0 |     |

Time taken to perform CBE: \_\_\_\_\_

Comments (if any): \_\_\_\_\_

Assessor's Name and Designation: \_\_\_\_\_

Assessor's signature: \_\_\_\_\_

**References:**

*Bates Guide To Physical Examination and History Taking 13th Edition - Dr Notes.* (n.d.). Retrieved December 10, 2021, from <https://dr-notes.com/bates-guide-to-physical-examination-and-history-taking-13th-edition-6er>  
*Breast Exam | Stanford Medicine 25 | Stanford Medicine.* (n.d.). Retrieved December 10, 2021, from <https://stanfordmedicine25.stanford.edu/the25/BreastExam.html>

Mcdonald, S., Saslow, D., & Alciati, M. H. (2004). Performance and Reporting of Clinical Breast Examination: A Review of the Literature. *J Clin*, 54, 345–361. <http://CAonline.AmCancerSoc.org>

Bobo JK, Lee NC, Thames SF. Findings From 752 081 Clinical Breast Examinations Reported to a National Screening Program From 1995 Through 1998. *JNCI: Journal of the National Cancer Institute* [Internet]. 2000 Jun 21 [cited 2021 Dec 20];92(12):971–6. Available from: <https://academic.oup.com/jnci/article/92/12/971/2905789>
